# Supplementary material for: Prediction Model for Identifying a High-Risk Group for Food Insecurity among Elderly South Koreans
Source: Research Square preprint supplement (doi:10.21203/rs.3.rs-4962048/v1), 2024-10-03
Supplement: Supplementary file 1 [file 2a0f6d805f7de347681c0ba0.docx]

**Tables**

Table 1. Comparison of General characteristics (N=79,401)

| **Characteristics** | **Categories** | **A group**  **(n=39,207, 49.4)** | **B group**  **(n=32,747, 41.2)** | **C group**  **(n=6,404, 8.1)** | **D group**  **(n=1,043, 1.3)** | **p-value** |
| --- | --- | --- | --- | --- | --- | --- |
| **N(%) or M±SD** | | | |
| Age | Young-old  (65-74) | 23615(60.2) | 16229(49.6) | 2727(42.6) | 436(41.8) | <.001 |
| Old-old  (75-84) | 12564(32) | 12911(39.4) | 2782(43.4) | 441(42.3) |
| Oldest-old  (≥85) | 3028(7.7) | 3607(11) | 895(14) | 166(15.9) |
| Sex | Male | 18000(45.9) | 13252(40.5) | 2310(36.1) | 384(36.8) | <.001 |
| Female | 21207(54.1) | 19495(59.5) | 4094(63.9) | 659(63.2) |
| Marital status | Single | 184(0.5) | 234(0.7) | 125(2) | 30(2.9) | <.001 |
| Married | 39018(99.5) | 32511(99.3) | 6277(98.0) | 1012(97.1) |
| Education level | ≤High school | 33863(86.4) | 30938(94.5) | 6201(96.8) | 1013(97.1) | <.001 |
| ≥College graduate | 5344(13.6) | 1809(5.5) | 203(3.2) | 30(2.9) |
| Economic activity | Yes | 17803(45.4) | 13151(40.2) | 1745(27.2) | 196(18.8) | <.001 |
| No | 21403(54.6) | 19595(59.8) | 2659(72.8) | 847(81.2) |
| Residence area | City | 16957(43.2) | 13737(41.9) | 3035(47.4) | 3035(47.4) | <.001 |
| Province | 22250(56.8) | 19010(58.1) | 3369(52.6) | 3369(52.6) |
| Household type | Single | 7248(18.5) | 10043(30.7) | 3132(48.9) | 569(54.6) | <.001 |
| Other | 31959(81.5) | 22704(69.3) | 3272(51.1) | 474(45.4) |
| Basic livelihood recipients | Yes | 947(2.4) | 2806(8.6) | 1771(27.7) | 383(36.7) | <.001 |
| No | 38251(97.6) | 29937(91.4) | 4632(72.3) | 660(63.3) |
| Household income  (10,000won, month) | | 262.3±237.5 | 145.1±131.5 | 82.2±60.9 | 68.5±48.6 | <.001 |
| Household income changes by  COVID-19 | Decrease | 8645(22.1) | 8263(25.3) | 1625(25.4) | 285(27.3) | <.001 |
| No change | 28036(71.5) | 23170(70.8) | 4561(71.2) | 706(67.7) |
| Increase | 2509(6.4) | 1288(3.9) | 218(3.4) | 52(5.0) |
| Life satisfaction | Low  (0-5) | 13975(35.6) | 17391(53.1) | 4433(69.2) | 812(77.9) | <.001 |
| High(6-10) | 25232(64.4) | 15356(46.9) | 1971(30.8) | 231(22.1) |
| Quality of life | Bad(<50%) | 12231(31.2) | 14856(45.4) | 3940(61.5) | 730(70) | <.001 |
| Good(≥50%) | 26976(68.8) | 17891(54.6) | 2464(38.5) | 313(30) |

Table 2. Health related characteristics

| **Characteristics** | **Categories** | **A group**  **(n=39207, 49.4)** | **B group**  **(n=32747, 41.2)** | **C group**  **(n=6404, 8.1)** | **D group**  **(n=1043, 1.3)** | **p-value** |
| --- | --- | --- | --- | --- | --- | --- |
| **N(%) or M±SD** | | | |
| Body Mass Index  (kg/m2) | Underweight | 1552(4.1) | 1797(5.8) | 455(7.4) | 78(7.8) | <.001 |
| Normal | 26016(68.2) | 21480(68.3) | 4103(66.9) | 669(66.7) |
| Overweight | 9733(25.5) | 7439(23.6) | 1402(22.9) | 231(23.0) |
| Obesity | 867(2.3) | 753(2.4) | 169(2.8) | 25(2.5) |
| Drinking alcohol | Yes | 27026(68.9) | 21560(65.8) | 3985(62.2) | 636(61) | <.001 |
| No | 12180(31.1) | 11187(34.2) | 2419(37.8) | 407(39) |
| Frequency of  drinking | None | 10736(39.7) | 10112(19) | 2124(53.3) | 375(59) | <.001 |
| <1/month | 4669(17.3) | 3593(16.7) | 639(16) | 82(12.9) |
| 1/month | 2338(8.7) | 1637(7.6) | 280(7) | 34(5.3) |
| 2-4/month | 3803(14.1) | 2436(11.3) | 346(8.7) | 63(9.9) |
| 2-3/week | 2984(11) | 1892(8.8) | 312(7.8) | 39(6.1) |
| 4/week | 2496(9.2) | 1890(8.8) | 284(7.1) | 43(6.8) |
| Amount of  drinking | 1-2cups | 8304(51) | 6157(53.8) | 986(53) | 114(43.7) | <.001 |
| 3-4cups | 3683(22.6) | 2584(22.6) | 402(21.6) | 66(25.3) |
| 5-6cups | 1383(8.5) | 916(8) | 137(7.4) | 19(7.3) |
| 7-9cups | 2202(13.5) | 1399(12.2) | 256(13.8) | 45(17.2) |
| ≥10cups | 718(4.4) | 392(3.4) | 80(4.3) | 17(6.5) |
| Frequency of  breakfast | None | 409(1) | 469(1.4) | 157(2.5) | 32(3.1) | <.001 |
| 1-2/week | 934(2.4) | 1077(3.3) | 297(4.6) | 59(5.7) |
| 3-4/week | 36433(92.9) | 29943(91.4) | 5605(87.5) | 860(82.5) |
| 5-7/week | 1430(3.6) | 1258(3.8) | 344(5.4) | 92(8.8) |
| Recognition of  nutrition label | Yes | 15632(40) | 9695(29.7) | 1428(22.4) | 207(19.9) | <.001 |
| No | 23473(60) | 22926(70.3) | 4954(77.6) | 835(80.1) |
| Interpretation of nutrition label | Yes | 5599(35.8) | 3019(31.1) | 474(33.2) | 64(30.9) | <.001 |
| No | 10030(64.2) | 6673(68.9) | 954(66.8) | 143(69.1) |
| Use of nutrition  label | Yes | 4447(79.5) | 2259(74.9) | 346(73) | 48(76.2) | <.001 |
| No | 1149(20.5) | 758(25.1) | 128(27) | 15(23.8) |
| Oral health  status | Bad | 16207(41.3) | 17451(53.3) | 4201(65.6) | 717(68.7) | <.001 |
| Average | 14283(36.4) | 10552(32.2) | 1568(24.5) | 242(23.2) |
| Good | 8716(22.2) | 4743(14.5) | 634(9.9) | 84(8.1) |
| Chewing | Bad | 22267(56.8) | 13749(42) | 1882(29.4) | 242(23.2) | <.001 |
| Average | 6412(16.4) | 6028(18.4) | 1042(16.3) | 152(14.6) |
| Good | 10528(26.9) | 12969(39.6) | 3480(54.3) | 649(62.2) |
| Experience of  cognitive dysfunction | Yes | 12314(31.4) | 12646(38.6) | 3186(49.8) | 520(49.9) | <.001 |
| No | 26883(68.6) | 20091(61.4) | 3211(50.2) | 522(50.1) |
| Depression  (PHQ-9, score 10) | Yes | 1128(2.9) | 1897(5.8) | 865(13.6) | 252(24.3) | <.001 |
| No | 37977(97.1) | 30682(94.2) | 5498(86.4) | 783(75.7) |
| Use of health  facilities | Yes | 20057(51.2) | 17181(52.5) | 3049(47.6) | 458(44) | <.001 |
| No | 19145(48.8) | 15560(47.5) | 3354(52.4) | 584(56) |
| Subjective health status | Bad | 10988(28) | 13677(41.8) | 3720(58.1) | 698(66.9) | <.001 |
| Average | 16144(41.2) | 12512(38.2) | 1881(29.4) | 238(22.8) |
| Good | 12074(30.8) | 6558(20) | 803(12.5) | 107(10.3) |

Table 3. Validation of prediction model

| **Method** | **Method** | **Risk Estimate** | **Standard Error** |
| --- | --- | --- | --- |
| Split-sample test | Training | .45 | .002 |
| Test | .46 | .002 |
